# Supplementary material for: Perovskite La1−xKxCoO3−δ (0 ≤ x ≤ 0.5): a novel bifunctional OER/ORR electrocatalyst and supercapacitive charge storage electrode in a neutral Na2SO4 electrolyte
Source: Royal Society of Chemistry journal article supplement (doi:10.1039/d2cp04708j), 2022-01-01
Supplement: d2cp04708j1.pdf [file d2cp04708j1.pdf]

## Electronic Supplementary Information:

### Perovskite $\text{La}_{1-x}\text{K}_x\text{CoO}_{3-\delta}$ ( $0 \leq x \leq 0.5$ ): A Novel Bifunctional OER/ORR electrocatalyst and Supercapacitive charge Storage electrode in Neutral $\text{Na}_2\text{SO}_4$ Electrolyte

Rakesh Mondal<sup>1</sup>, Neeraj Kumar Mishra<sup>1</sup>, Mahatim Singh<sup>2</sup>, Asha Gupta<sup>3</sup>, and Preetam Singh<sup>1\*</sup>

1. Department of Ceramic Engineering, Indian Institute of Technology (Banaras Hindu University) Varanasi, Uttar Pradesh, 221005, India
2. Department of Biomedical Engineering, Indian Institute of Technology (Banaras Hindu University) Varanasi, Uttar Pradesh, 221005, India
3. Department of Chemistry, Indian Institute of Technology (Banaras Hindu University) Varanasi, Uttar Pradesh, 221005, India

**\*: corresponding Author**

**Email:** [preetamsingh.cer@itbhu.ac.in](mailto:preetamsingh.cer@itbhu.ac.in)  
[preetamchem@gmail.com](mailto:preetamchem@gmail.com)

**Phone:** 91-9473720659

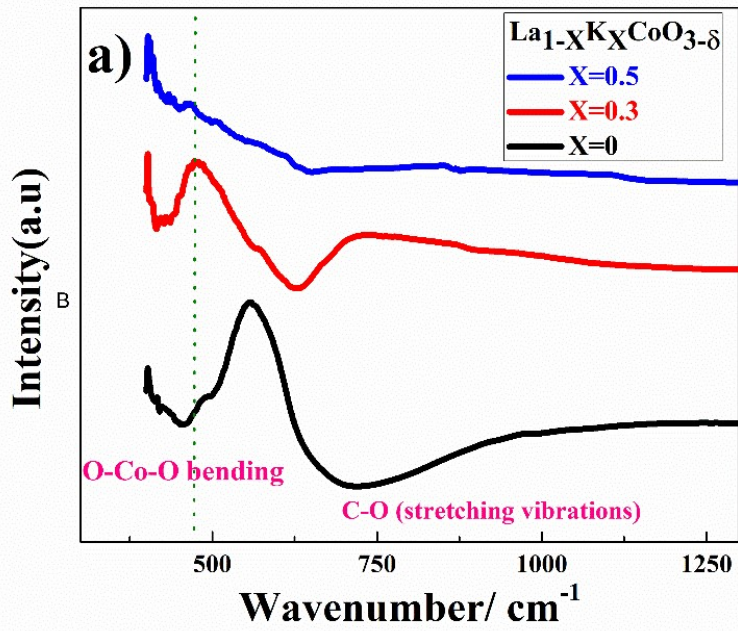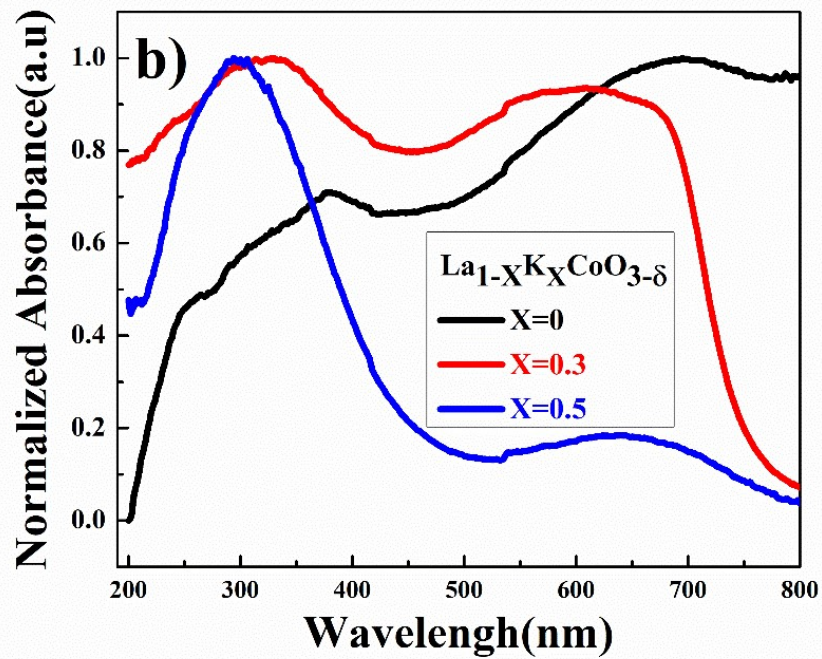

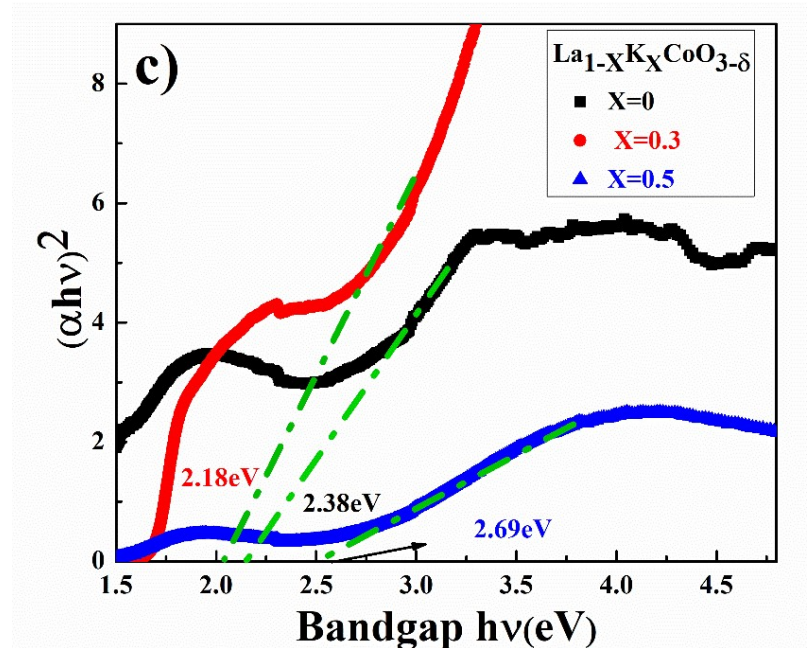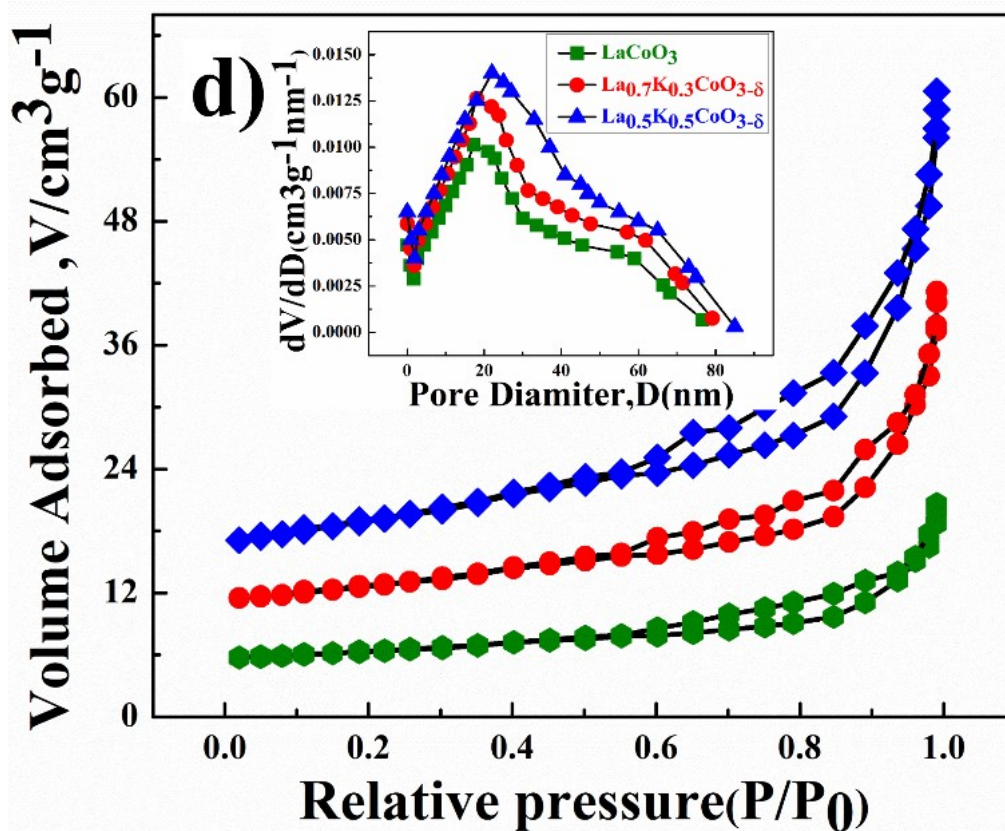

**Supporting Fig. S1.** (a) FTIR, (b) UV-vis absorption spectrum, (c) Optical bandgap and (d)  $\text{N}_2$  adsorption/desorption isotherms of  $\text{La}_{1-x}\text{K}_x\text{CoO}_{3-\delta}$  ( $x=0, 0.3, 0.5$ ) samples.

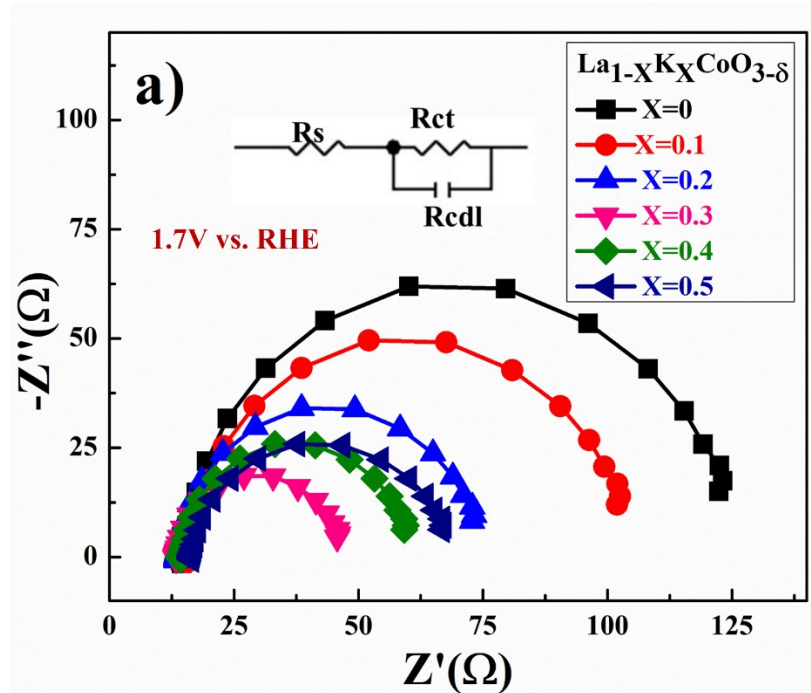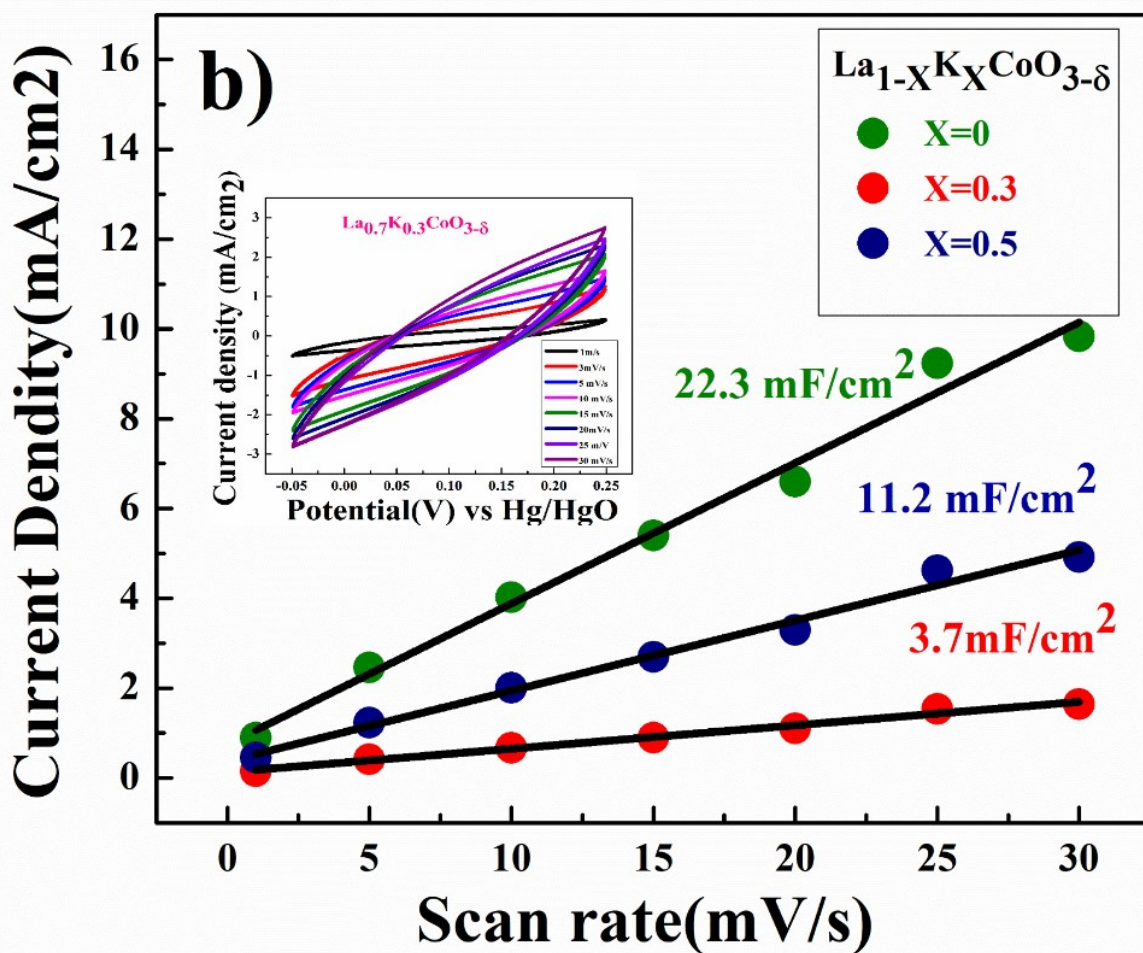

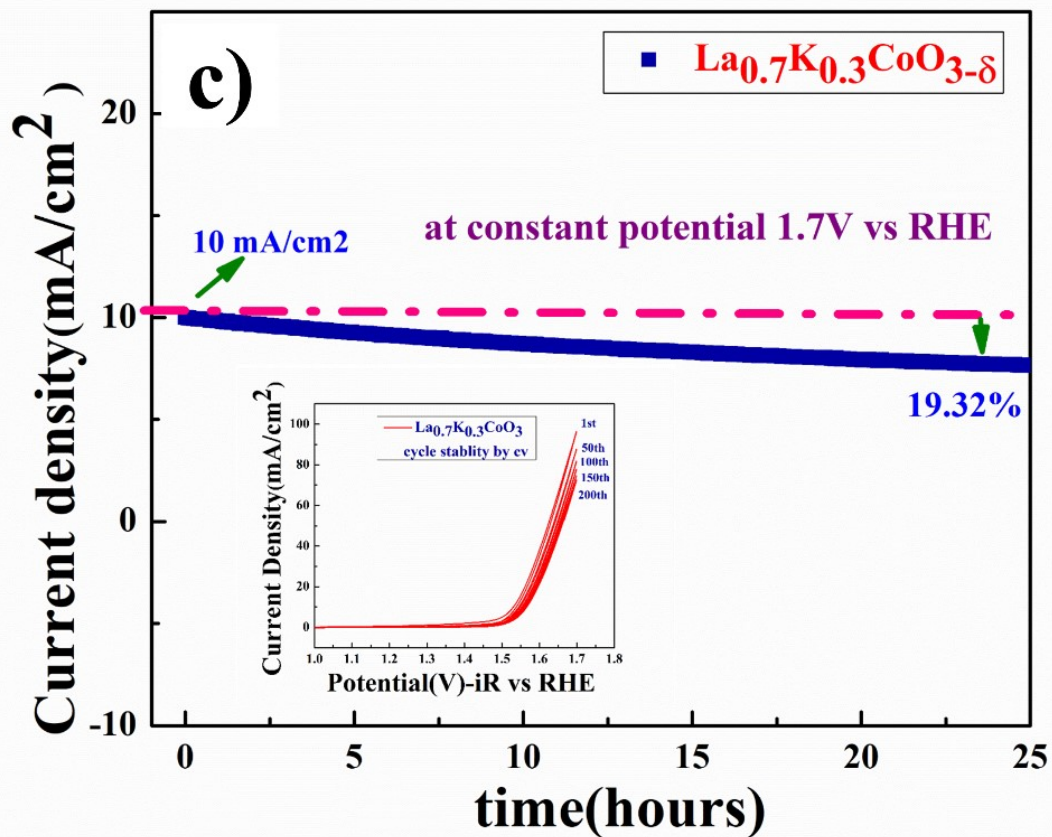

**Supporting Fig. S2.** (a) Electrochemical impedance (EIS) spectra for the the  $\text{La}_{1-x}\text{K}_x\text{CoO}_{3-\delta}$  ( $0 \leq x \leq 0.5$ ) samples at 1.7V vs RHE (b) Chronoamperometric responses of  $\text{La}_{0.7}\text{K}_{0.3}\text{CoO}_{3-\delta}$  electrode at constant potentials at 1.7 V vs. RHE at an initial current density of 10 mA/ cm<sup>2</sup>. (Insert represents the retention by CV stability). (c) represent chronoamperometric current stability of the  $\text{La}_{0.7}\text{K}_{0.3}\text{CoO}_{3-\delta}$  sample.

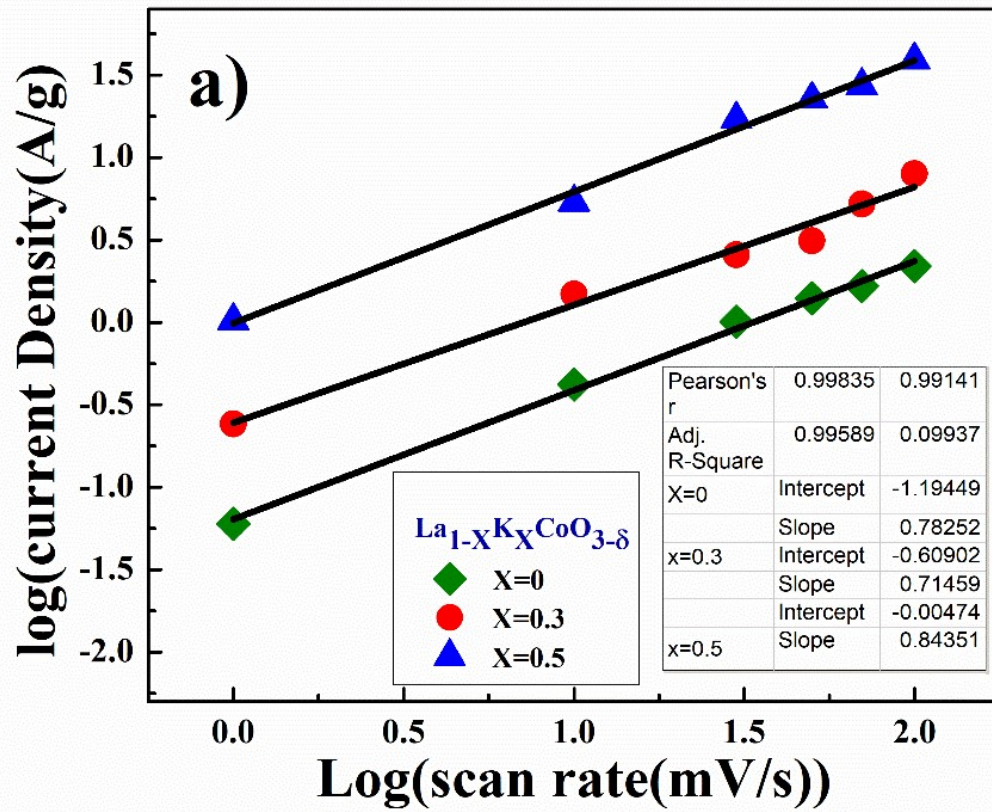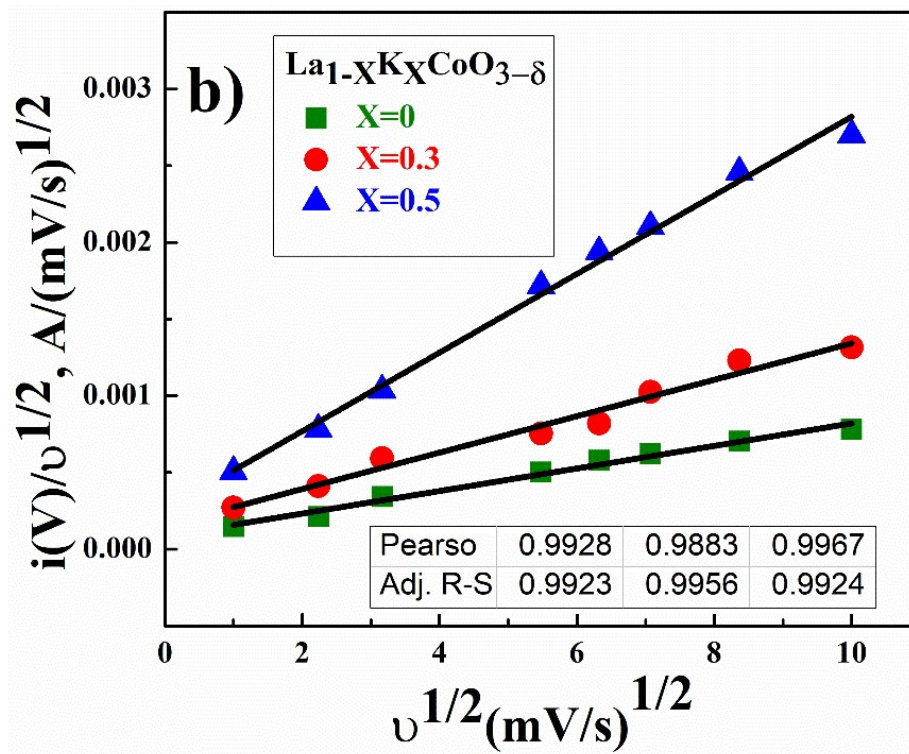

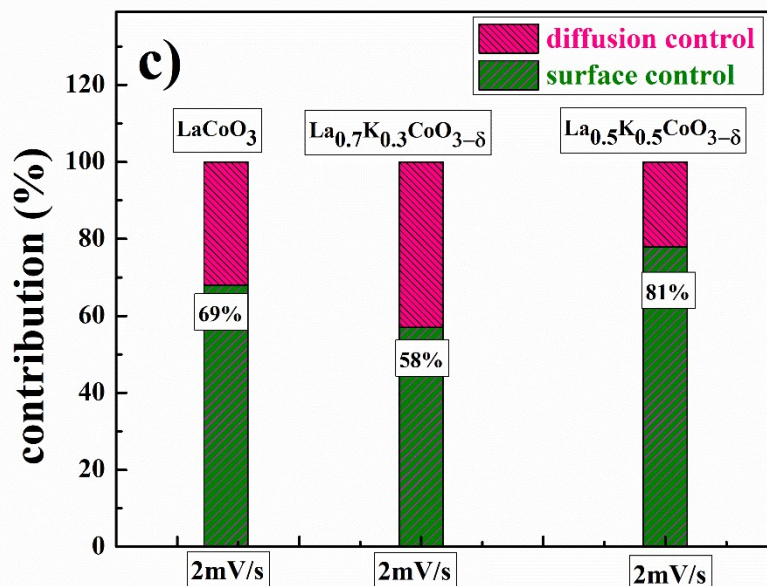

**Supporting Fig. S3.** (a) Plot of linear relationship between log (peak current) and log (scan rate) at two different scan rate of of La<sub>1-x</sub>K<sub>x</sub>CoO<sub>3-δ</sub> (x = 0, 0.3, 0.5) samples, (b) Plot of power's law plot of charged and discharged state of La<sub>1-x</sub>K<sub>x</sub>CoO<sub>3-δ</sub> (x = 0, 0.3, 0.5) samples. (c) Contribution of diffusion controlled and surface capacitance at different scan rates for La<sub>1-x</sub>K<sub>x</sub>CoO<sub>3-δ</sub> (x =0, 0.3, 0.5) samples at scan rate of 2mV/s
